# Supplementary material for: Structural Consequences of Antigenic Variants of Human A/H3N2 Influenza Viruses
Source: MDPI journal article supplement (doi:10.3390/v15041008), 2023-04-19
Supplement: s1 [file s1]

## S2. Materials and Methods

### S2.1 Biophysical Properties of Amino Acids

Amino acids are commonly grouped according to similarities in various biophysical properties of the sidechain, notably the total charge and the polarity(the distribution of charge). This results in four groupings - those with a positively charged sidechain (Arg, His, Lys); a negatively charged sidechain (Asp, Glu); a polar, uncharged sidechain (Ser, Thr, Asn, Gln) or with a non-polar uncharged sidechain(Ala, Val, Ile, Leu, Met, Phe, Tyr, Trp)(Table S1). Additionally there are three amino acids which have unique properties - Cys, Gly and Pro(which is strictly an imino acid).

**Table S1. Summary of biophysical properties of amino acids.**

| Amino Acid    | Three Letter Code | Sidechain Accessible Surface Area (Å <sup>2</sup> ) * | Length (Å) | Net charge at pH 7.4 | Polarity | Biophysical Property                                                                           |
|---------------|-------------------|-------------------------------------------------------|------------|----------------------|----------|------------------------------------------------------------------------------------------------|
| Glycine       | Gly               | 0                                                     | 3.9        | 0                    | 9        | Non-polar                                                                                      |
| Alanine       | Ala               | 67                                                    | 5.5        | 0                    | 8.1      | Non-polar. $\beta$ -branched sidechain                                                         |
| Serine        | Ser               | 80                                                    | 6.1        | 0                    | 9.2      | Polar. Hydrogen bonding possible                                                               |
| Threonine     | Thr               | 102                                                   | 6.1        | 0                    | 8.6      | Polar. Hydrogen bonding possible                                                               |
| Cysteine      | Cys               | 104                                                   | 6.4        | 0 <sup>†</sup>       | 5.5      | Non-polar. Sulphur atom able to form covalent bonds with the sulphur atom of another cysteine. |
| Proline       | Pro               | 105                                                   | 6.2        | 0                    | 8        | Non-polar. Very restricted conformation                                                        |
| Aspartic acid | Asp               | 106                                                   | 6.5        | -1                   | 13       | Hydrogen bonding possible                                                                      |
| Asparagine    | Asn               | 113                                                   | 7.5        | 0                    | 11.6     | Polar. Hydrogen bonding possible                                                               |
| Valine        | Val               | 117                                                   | 7.0        | 0                    | 5.9      | Non-polar. $\beta$ -branched sidechain                                                         |
| Leucine       | Leu               | 137                                                   | 8.5        | 0                    | 4.9      | Non-polar. $\beta$ -branched sidechain                                                         |
| Glutamic acid | Glu               | 138                                                   | 8.0        | -1                   | 12.3     | Hydrogen bonding possible                                                                      |
| Isoleucine    | Ile               | 140                                                   | 8.5        | 0                    | 5.2      | Non-polar. $\beta$ -branched sidechain                                                         |
| Glutamine     | Gln               | 144                                                   | 9.0        | 0                    | 10.5     | Polar Hydrogen bonding possible                                                                |
| Histidine     | His               | 151                                                   | 8.5        | 0 <sup>†</sup>       | 10.4     | Aromatic                                                                                       |
| Methionine    | Met               | 160                                                   | 10.3       | 0                    | 5.7      | Non-polar. $\beta$ -branched sidechain                                                         |
| Lysine        | Lys               | 167                                                   | 11.3       | +1                   | 11.3     | Hydrogen bonding possible                                                                      |
| Phenylalanine | Phe               | 175                                                   | 9.7        | 0                    | 5.2      | Non-polar. Aromatic sidechain                                                                  |
| Tyrosine      | Tyr               | 187                                                   | 10.4       | 0                    | 6.2      | Aromatic. Hydrogen bonding possible                                                            |
| Arginine      | Arg               | 196                                                   | 11.0       | +1                   | 10.5     | Charged. Hydrogen bonding possible                                                             |
| Tryptophan    | Trp               | 217                                                   | 10.9       | 0                    | 5.4      | Non-polar. Aromatic                                                                            |

\* The Solvent accessible surface area(ASA) of amino acid side chain for residue X in a Gly-X-Gly tripeptide is defined as the surface traced by the center of a sphere with the radius of a water molecule (0.15 nm) as it is rolled over the surface of the structure. This can be categorised into very small (yellow); small (saffron); medium (orange);large (red). †The imidazole sidechain of histidine has a pKa of approximately 6.0 so relatively small shifts in pH will change its average charge. At physiological pH(7.4), about 4% of histidines will be protonated and have a charge of +1. The pKa of cysteine is 8.3. At physiological pH, about 11% will be de-protonated and have a charge of -1.
